# Supplementary material
Source: Springer Nature journal article supplement (https://www.springermedizin.de/resource/supplementary/13012_2009_266_MOESM1_ESM.pdf/9629594)

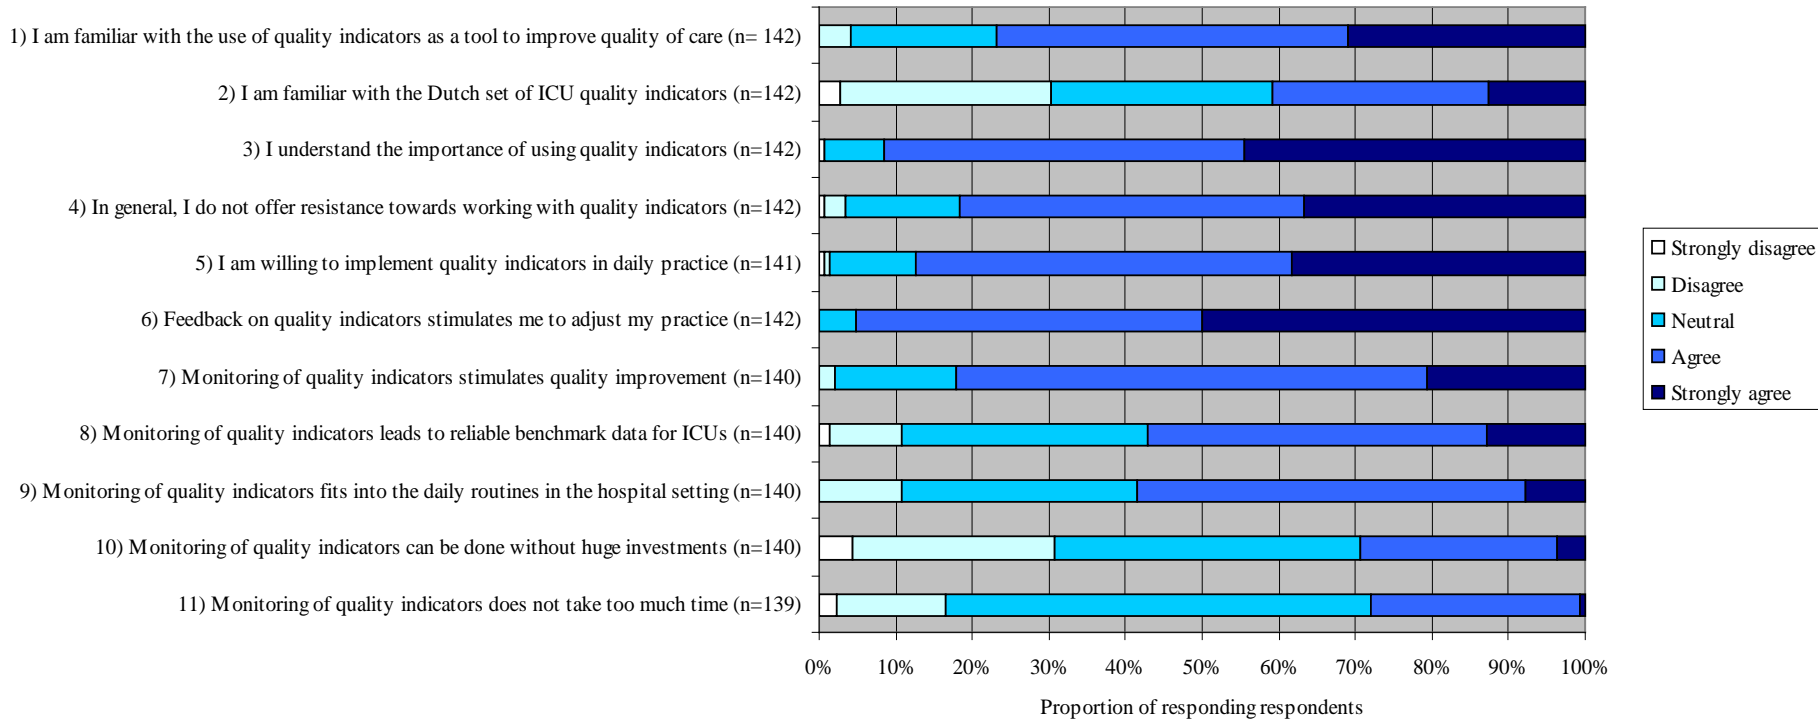

Supplement: MOESM1 [file 9629594]
